# Supplementary material for: Adaptive Ecological Niche Migration does not Negate Extinction Susceptibility
Source: Research Square preprint supplement (doi:10.21203/rs.3.rs-396209/v1), 2021-04-08
Supplement: Supplementary file 1 [file f3e2119e582270a30f3b3c52.pdf]

| Parameter      | <i>D. altispira</i>    | Position                     | <i>D. baroemoenensis</i> | Position                   |
|----------------|------------------------|------------------------------|--------------------------|----------------------------|
| Carbon         | 0.5492                 | Within P1                    | 0.07428                  | Within P1                  |
| Oxygen         | 0.2239                 | Within PT                    | 0.7708                   | Within P2                  |
| U_Area         | <b><i>0.004858</i></b> | <b><i>Within P2</i></b>      | <b><i>0.00429</i></b>    | <b><i>Final sample</i></b> |
| U_Aspect Ratio | 0.1084                 | Within PT                    | 0.09192                  | 1st PT sample              |
| U_Dmax         | 0.07362                | Within P2                    | <b><i>0.006501</i></b>   | <b><i>Final sample</i></b> |
| U_Dmin         | <b><i>0.02256</i></b>  | <b><i>Within P2</i></b>      | <b><i>0.01497</i></b>    | <b><i>Final sample</i></b> |
| U_Range        | 0.2757                 | Within P1                    | 0.1778                   | Within P2                  |
| U_Roundness    | <b><i>0.0396</i></b>   | <b><i>Within P1</i></b>      | NA                       | NA                         |
| U_Circularity  | 0.2506                 | 1st PT sample                | NA                       | NA                         |
| L_Area         | <b><i>0.000794</i></b> | <b><i>Within P2</i></b>      | 0.06507                  | Final sample               |
| L_Aspect_Ratio | <b><i>0.02223</i></b>  | <b><i>Within PT</i></b>      | 0.06467                  | 1st P2 sample              |
| L_Dmax         | 0.05313                | Within P2                    | <b><i>0.01546</i></b>    | <b><i>Final sample</i></b> |
| L_Dmin         | <b><i>0.004458</i></b> | <b><i>Within P2</i></b>      | 0.264                    | Penultimate sample         |
| L_Range        | 0.06445                | 1st PT sample                | 0.08086                  | 1st P2 sample              |
| L_Roundness    | <b><i>0.01327</i></b>  | <b><i>Last PT sample</i></b> | NA                       | NA                         |
| L_Circularity  | 0.562                  | Within P2                    | NA                       | NA                         |

1

2 Table 1. Grubbs' Test results. Bold and italic results indicate statistical significance.

3 U = Umbilical, L = Lateral, P1 = Phase 1, P2 = Phase 2, PT = Phase Transition.
